# Supplementary material for: Temporal logic circuits implementation using a dual cross-inhibition mechanism based on DNA strand displacement
Source: Royal Society of Chemistry journal article supplement (doi:10.1039/d3ra03995a), 2023-01-01
Supplement: d3ra03995a1.pdf [file d3ra03995a1.pdf]

## Supplementary Information

Temporal logic circuits implementation using dual cross-inhibition mechanism based on DNA strand displacement

Yuan Liu,<sup>a</sup> Xiaokang Zhang,<sup>a</sup> Xun Zhang,<sup>a</sup> Xin Liu,<sup>a</sup> Bin Wang,<sup>b</sup> Qiang Zhang<sup>\*a</sup> and Xiaopeng Wei<sup>\*a</sup>

*a* School of Computer Science and Technology, Dalian University of Technology, Dalian 116024, China.

*b* Key Laboratory of Advanced Design and Intelligent Computing, Ministry of Education, School of Software Engineering, Dalian University, Dalian 116622, China.

# Contents

|     |                                                                                              |    |
|-----|----------------------------------------------------------------------------------------------|----|
| S1. | Kinetic characterization of the temporal OR gate.....                                        | 3  |
| S2. | Kinetics characterization of temporal OR gate at time intervals of 10 mins and 20 mins ....  | 4  |
| S3. | The effect of reaction rate constants $k_1$ and $k_{-1}$ .....                               | 5  |
| S4. | Slice plots of the surface plot.....                                                         | 6  |
| S5. | The effect of global concentration variation on the inhibition degree.....                   | 7  |
| S6. | The effect of the variation in the ratio of input to substrate.....                          | 8  |
| S7. | Investigation of the relationship between substrate concentration and inhibition degree .... | 9  |
| S8. | DNA sequences.....                                                                           | 10 |
| S9. | The Mathematica modelling code used for the simulation model.....                            | 11 |

## S1. Kinetic characterization of the temporal OR gate

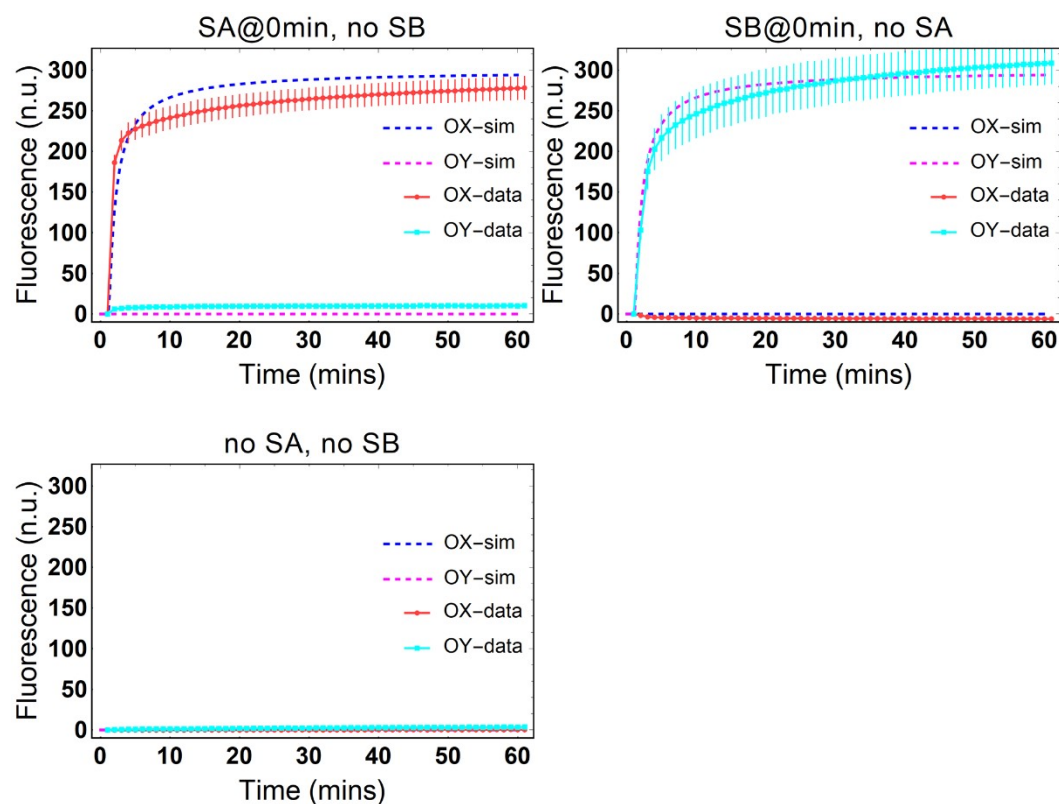

Fig. S1. Kinetic characterization of the temporal OR gate. The results of real-time fluorescence experiments, accompanied by simulated results for three cases including SA input only, SB input only and no input. Detector A, Detector B, Reporter X and Reporter Y are added as substrates in advance.  $[DA] = [DB] = [RX] = [RY] = 300\text{nM}$ ,  $[SA] = [SB] = 600\text{nM}$ . Fluorescence values in the experimental data were collected every minute.

## S2. Kinetics characterization of temporal OR gate at time intervals of 10 mins and 20 mins

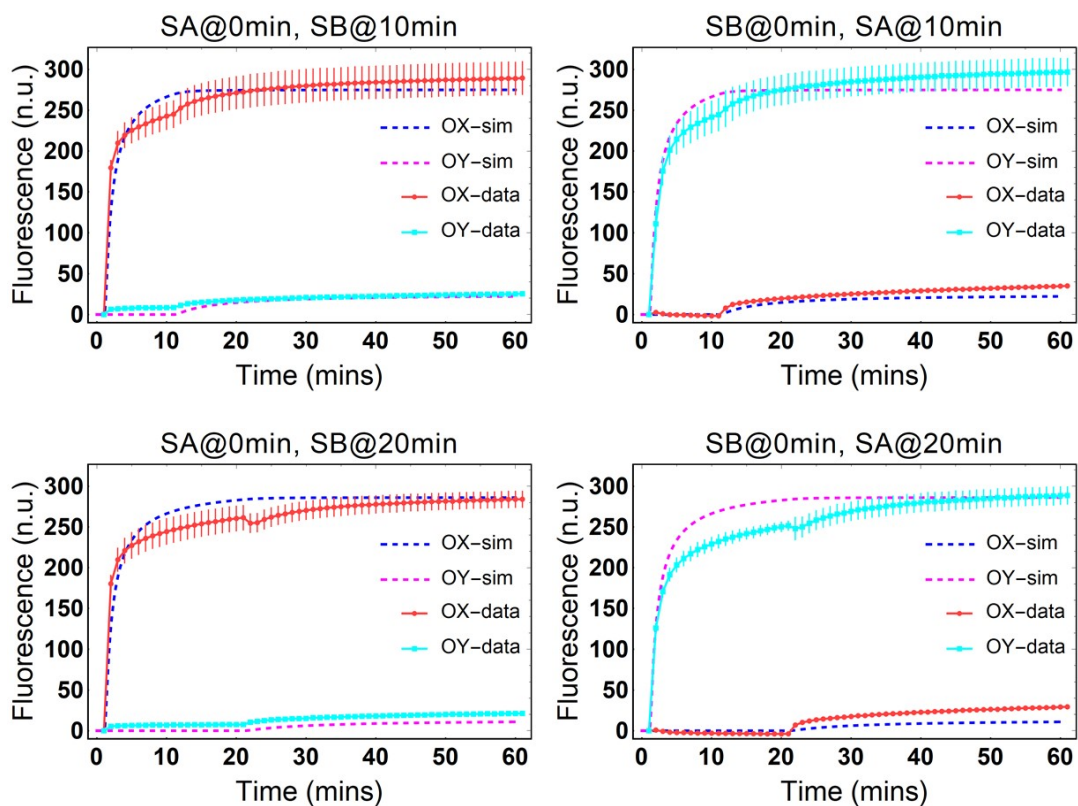

Fig. S2. Real-time fluorescence and simulation results with time intervals of 10 minutes and 20 minutes between SA and SB. The order of SA and SB additions, as well as the time intervals, are indicated above each plot. The terms "OX-data" and "OY-data" represent the experimental data for OX and OY, while "OX-sim" and "OY-sim" represent the simulation results for OX and OY. In all experiments and simulations,  $[DA] = [DB] = [RX] = [RY] = 300\text{nM}$ ,  $[SA] = [SB] = 600\text{nM}$ . DA, DB, RX and RY are added as substrates in advance.

S3. The effect of reaction rate constants  $k_1$  and  $k_{-1}$

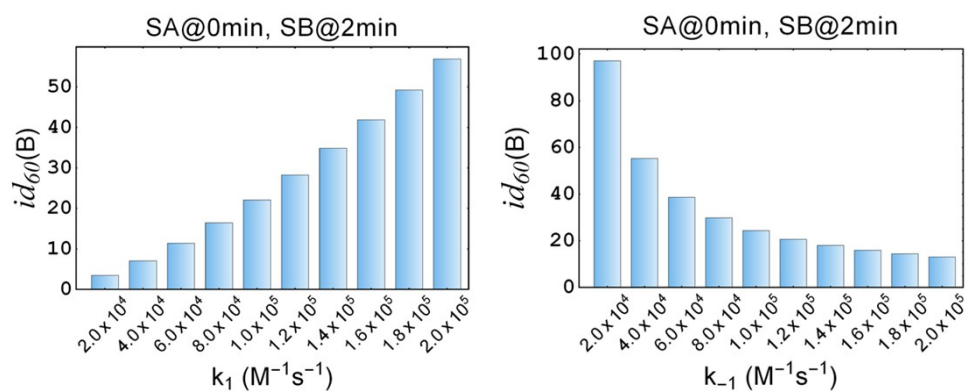

Fig. S3. The effect of reaction rate constants  $k_1$  and  $k_{-1}$  on the inhibition degree  $id_{60}(B)$  of temporal OR gate with incorporation of the annihilation gate. X-axis represents the reaction rate constant  $k_1$  and  $k_{-1}$ , while the Y-axis represents the inhibition degree. Here,  $k_2 = 1.7 \times 10^5 M^{-1}s^{-1}$ ,  $k_3 = 4 \times 10^5 M^{-1}s^{-1}$ ,  $k_a = 10^{13} M^{-2}s^{-1}$ ,  $[DA] = [DB] = [RX] = [RY] = [AG] = 300nM$ ,  $[SA] = [SB] = 600nM$ ; for the left figure,  $k_{-1} = 1.7 \times 10^5 M^{-1}s^{-1}$ , and for the right figure,  $k_1 = 7.5 \times 10^4 M^{-1}s^{-1}$ .

## S4. Slice plots of the surface plot

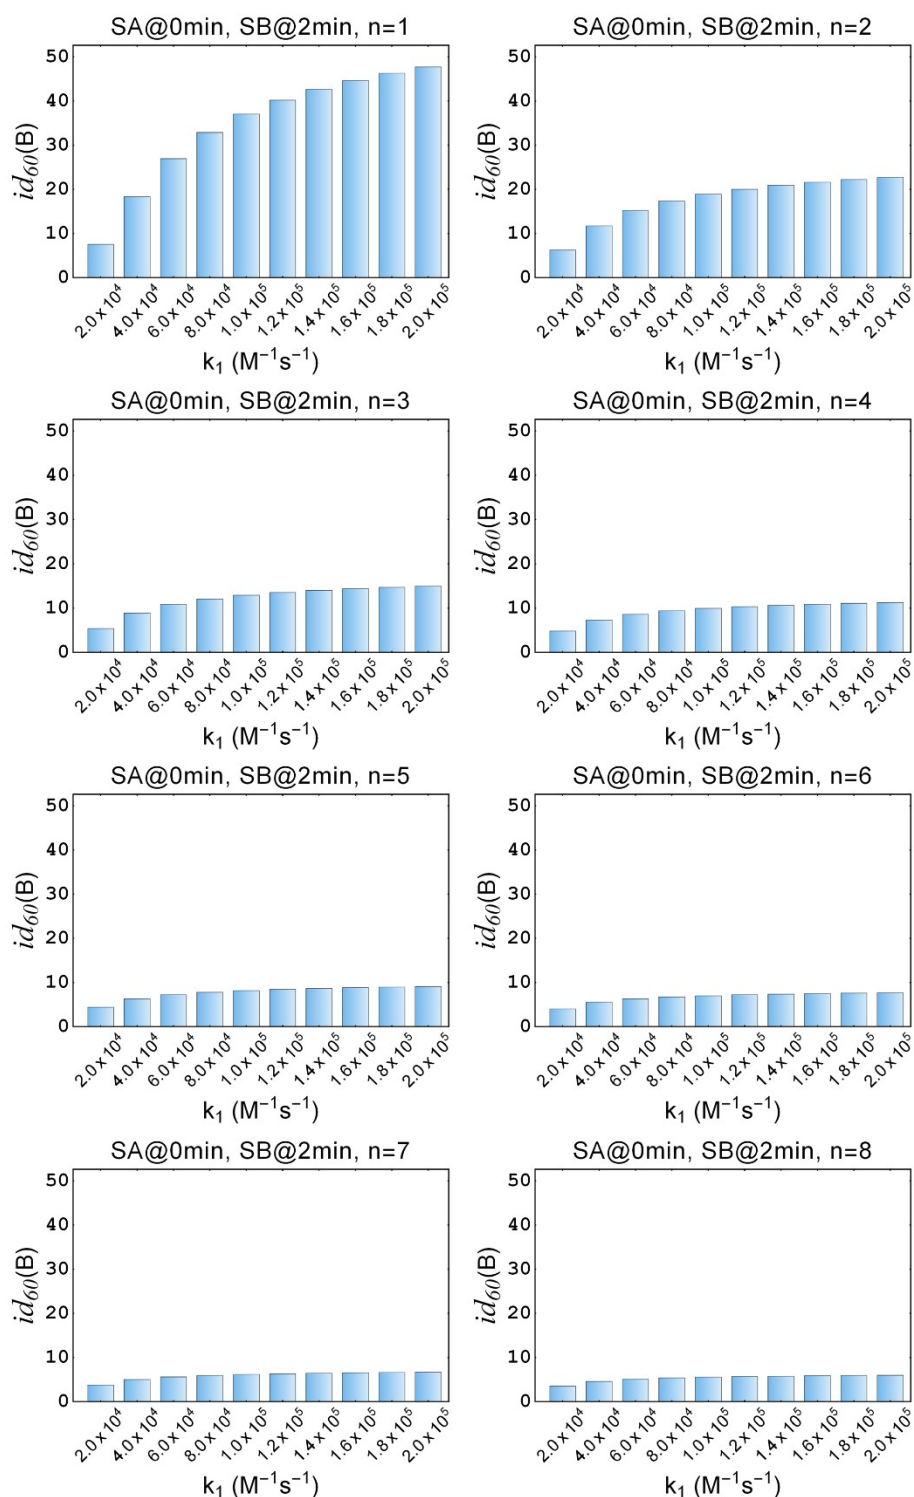

Fig. S4. Slice plots of the surface plot depicting the relationship between  $k_1$ ,  $k_2$ , and the degree of inhibition. In the plot label,  $n$  indicates that  $k_2$  is  $n$  times as large as  $k_1$ . The value of  $n$  is labeled in the title of each subfigure. In all subfigures, SA is added 2 minutes before SB.  $k_2 = 1.7 \times 10^5 M^{-1}s^{-1}$ ,  $k_3 = 4 \times 10^5 M^{-1}s^{-1}$ ,  $k_a = 10^{13} M^{-2}s^{-1}$ ,  $[DA] = [DB] = [RX] = [RY] = 300nM$ ,  $[SA] = [SB] = 600nM$ .

S5. The effect of global concentration variation on the inhibition degree

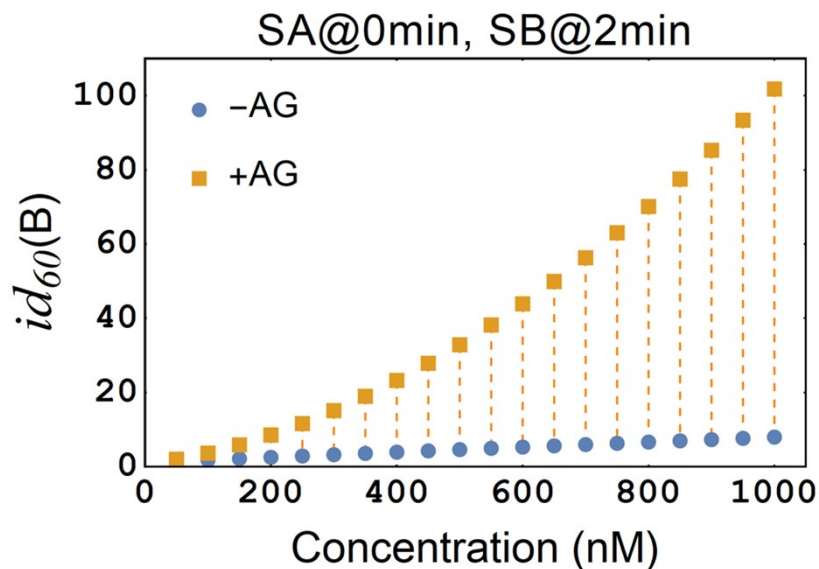

Fig. S5. The effect of global concentration variation on the inhibition degree. X-axis represents the concentrations of the substrates and the annihilation gate. Y-axis represents the inhibition degree. The ratio of the input to the substrate is kept at a constant of 2. The concentration of the annihilation gate is equal to the concentration of the four substrates.  $[DA] = [DB] = [RX] = [RY] = [AG]$ ,  $k_1 = 7.5 \times 10^4 \text{ M}^{-1}\text{s}^{-1}$ ,  $k_{-1} = 1.7 \times 10^5 \text{ M}^{-1}\text{s}^{-1}$ ,  $k_2 = 1.7 \times 10^5 \text{ M}^{-1}\text{s}^{-1}$ ,  $k_3 = 4 \times 10^5 \text{ M}^{-1}\text{s}^{-1}$ ,  $k_a = 10^{13} \text{ M}^{-2}\text{s}^{-1}$ .

S6. The effect of the variation in the ratio of input to substrate

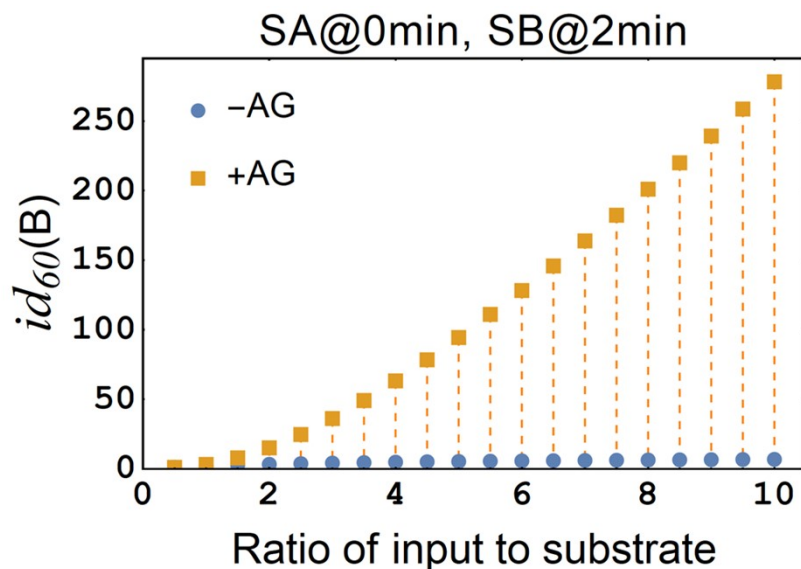

Fig. S6. The effect of the variation in the ratio of input to substrate on the degree of inhibition with the concentration of substrates being constant. The concentration of the annihilation gate is equal to the concentration of the four substrates (DA, DB, RX and RY).  $[DA] = [DB] = [RX] = [RY] = [AG]$ ,  $k_1 = 7.5 \times 10^4 \text{ M}^{-1}\text{s}^{-1}$ ,  $k_{-1} = 1.7 \times 10^5 \text{ M}^{-1}\text{s}^{-1}$ ,  $k_2 = 1.7 \times 10^5 \text{ M}^{-1}\text{s}^{-1}$ ,  $k_3 = 4 \times 10^5 \text{ M}^{-1}\text{s}^{-1}$ ,  $k_a = 10^{13} \text{ M}^{-2}\text{s}^{-1}$ .



S7. Investigation of the relationship between substrate concentration and inhibition degree

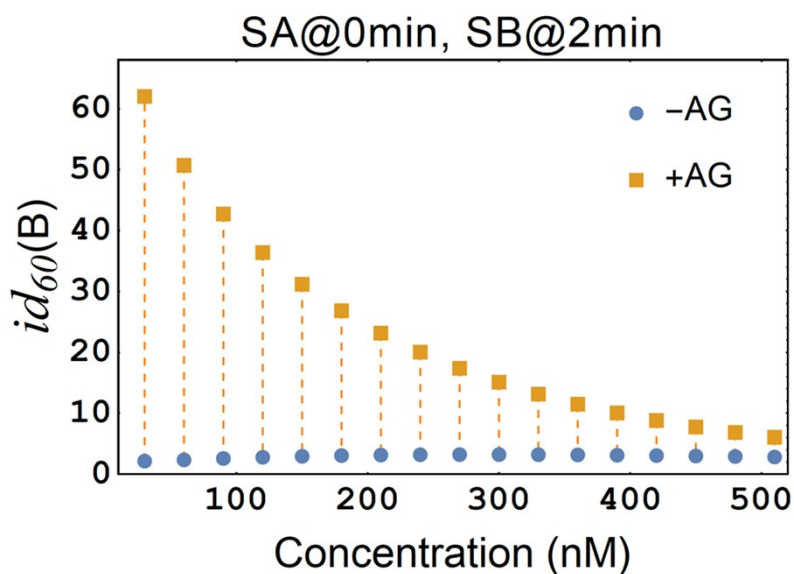

Fig. S7. Investigation of the relationship between substrate concentration and inhibition degree under fixed input and AG concentration. The concentrations of the input and the annihilation gate are fixed as constants. X-axis represents the concentration of the substrates DA, DB, RX and RY, while the Y-axis represents the inhibition degree.  $[DA] = [DB] = [RX] = [RY]$ ,  $[AG] = 300\text{nM}$ ,  $[SA] = [SB] = 600\text{nM}$ ,  $k_1 = 7.5 \times 10^4 \text{ M}^{-1}\text{s}^{-1}$ ,  $k_{-1} = 1.7 \times 10^5 \text{ M}^{-1}\text{s}^{-1}$ ,  $k_2 = 1.7 \times 10^5 \text{ M}^{-1}\text{s}^{-1}$ ,  $k_3 = 4 \times 10^5 \text{ M}^{-1}\text{s}^{-1}$ ,  $k_a = 10^{13} \text{ M}^{-2}\text{s}^{-1}$ .

## S8. DNA sequences

We used the analysis module of NUPACK ([www.nupack.org](http://www.nupack.org)) to analyze the DNA sequences used, in order to minimize potential crosstalk and leakage.

Table S1. DNA sequences and modifications

| DNA strand | Sequence (5' to 3')                                                          | Domains        | Length (nt) |
|------------|------------------------------------------------------------------------------|----------------|-------------|
| SA         | TACATTCAT <b>TCGT</b> ACCATCCACTAGCACACACTGAGAC                              | c1, t, b       | 37          |
| DA5 (SY)   | TCTCAAATCCTCTGTAACGTTGGACTCTCGTCACTG                                         | y, a           | 36          |
| DA3 (KA)   | CATCCACTAGCACACACTGAGACAT <b>GCAC</b>                                        | b, s           | 29          |
| DAD        | <b>GTGCAT</b> GTCTCAGTGTGTGCTAGTGGATGGT <b>ACGAC</b> AGTGACGAGAGTCCAACGT TAC | a*, t*, b*, s* | 58          |
| SB         | TAGTATCTAT <b>GCAC</b> GTAAACGTTGGACTCTCGTCACTG                              | c2, s, a       | 37          |
| DB5 (SX)   | TTCTACTCTACCACATCCACTAGCACACACTGAGAC                                         | x, b           | 36          |
| DB3 (KB)   | GTAACGTTGGACTCTCGTCACTG <b>TCGTAC</b>                                        | a, t           | 29          |
| DBD        | <b>GTACGAC</b> AGTGACGAGAGTCCAACGTTAC <b>GTGCAT</b> GTCTCAGTGTGTGCTAGTGATG   | b*, s*, a*, t* | 58          |
| XRU (OX)   | (FAM)-TTCTACTCTACCACATCCA                                                    | x, b1          | 19          |
| XRD        | <b>TGCTAGTGGATGTGGT</b> AGAGTAGAA-(BHQ1)                                     | x*, b2*        | 25          |
| YRU (OY)   | (HEX)-TCTCAAATCCTCTGTAACG                                                    | y, a1          | 19          |
| YRD        | <b>GTCCAACGTTACAGAGGATTTGAGA-</b> (BHQ1)                                     | y*, a2*        | 25          |

Notes: The sequences of the toeholds are highlighted in bold.

Table S2. Composition of all complexes

| Complex         | DNA strands   |
|-----------------|---------------|
| DA (Detector A) | DA5, DA3, DAD |
| DB (Detector B) | DB5, DB3, DBD |
| RX (Reporter X) | XRU, XRD      |
| RY (Reporter Y) | YRU, YRD      |

## S9. The Mathematica modelling codes used for the simulation

The simulation codes were running on Wolfram Mathematica 12.0. (Link for CRNSimulator: <https://users.ece.utexas.edu/~soloveichik/crnsimulator.html>).

Modelling codes for temporal OR gate:

Note: requires CRNSimulator.m and CRNSimulatorExtensions.m to be loaded.

```
<< "D:\\dir\\CRNSimulator.m"
<< "D:\\dir\\CRNSimulatorExtensions.m"
Clear[prinArray];
prinMatrix = Import["D:\\dir\\figure1.xlsx"];
nLength = 61;
prinArray=Table[0*i*j,{i,24},{j,nLength}];
For[j=1,j<nLength+1,j++,
  For[i=1,i<24+1,i++,prinArray[[i,j]]=prinMatrix[[1,j,i]]/9.8
  ];
curve1=Table[Around[prinArray[[1,n]],prinArray[[5,n]]],{n,61}];
curve2=Table[Around[prinArray[[2,n]],prinArray[[6,n]]],{n,61}];
curve3=Table[Around[prinArray[[3,n]],prinArray[[7,n]]],{n,61}];
curve4=Table[Around[prinArray[[4,n]],prinArray[[8,n]]],{n,61}];
k1=7.5*10^4;
k2=1.7*10^5;
k3=1.7*10^5;
k4=4*10^5;
nSub=300;
nInput=600;
rsys={
  revrxn[SA+DA,W1+KA,k1,k2],
  revrxn[SB+DB,W2+KB,k1,k2],
  rxn[KA+DB,SX+W4,k3],
  rxn[KB+DA,SY+W3,k3],
  rxn[SX+RX,OX+W5,k4],
  rxn[SY+RY,OY+W6,k4],
  conc[DA,nSub*10^-9],
  conc[DB,nSub*10^-9],
  conc[RX,nSub*10^-9],
  conc[RY,nSub*10^-9]
};
schedule1={
  {1*60,0,0},
  {30*60,nInput*10^-9,0},
  {30*60,0,nInput*10^-9}
};
tmax=60*60;
```

```

sol=SimulateRxnsysWithSchedule[rsys,schedule1,{SA,SB}];
plotter1={OX[t*60]*10^9,OY[t*60]*10^9}/.sol;
xoSimu1 = Plot[plotter1,{t,0,tmax/60},PlotRange->{0,All},
  PlotStyle->{{Thick,RGBColor["#0000FF"],Dashed},{Thick,RGBColor["#FF02FF"],Dashed}}];
xoExpe1 = ListLinePlot[{curve1,curve2},
  PlotStyle->{RGBColor["#FF4040"],Cyan},
  PlotMarkers->{Automatic, 4.5}];

```

Modelling codes for time-response characteristics:

```

figTime1={};
figTime2={};
data=Table[
  k1=7.5*10^4;
  k2=1.7*10^5;
  k3=1.7*10^5;
  k4=4*10^5;
  nSub=300;
  nInput=600;
  rsys={
    revrxn[SA+DA,W1+KA,k1,k2],
    revrxn[SB+DB,W2+KB,k1,k2],
    rxn[KA+DB,SX+W4,k3],
    rxn[KB+DA,SY+W3,k3],
    rxn[SX+RX,OX+W5,k4],
    rxn[SY+RY,OY+W6,k4],
    conc[DA,nSub*10^-9],
    conc[DB,nSub*10^-9],
    conc[RX,nSub*10^-9],
    conc[RY,nSub*10^-9]};
  schedule={
    {0*60,0,0},
    {x*60,nInput*10^-9,0},
    {60*60,0,nInput*10^-9}};
  tmax=60*60;
  sol=SimulateRxnsysWithSchedule[rsys,schedule,{SA,SB}];
  AppendTo[figTime1 ,{x,OX[tmax]/OY[tmax]/.sol}];
  AppendTo[figTime2,{x,W1[tmax]/W2[tmax]/.sol}],
  {x,10,50,1}];

```

Modelling codes for the temporal OR gate with the incorporation of Annihilation Gate:

```

ClearAll;
k1=7.5*10^4;
k2=1.7*10^5;
k3=1.7*10^5;

```

```

k4=4*10^5;
nSub=150;
nInput=300;
nAnni =150;
intervalTime=2;
rsys1={
  revrxn[SA+DA,W1+KA,k1,k2],
  revrxn[SB+DB,W2+KB,k1,k2],
  rxn[KA+DB,SX+W4,k3],
  rxn[KB+DA,SY+W3,k3],
  rxn[SX+RX,OX+W5,k4],
  rxn[SY+RY,OY+W6,k4],
  conc[DA,nSub*10^-9],
  conc[DB,nSub*10^-9],
  conc[RX,nSub*10^-9],
  conc[RY,nSub*10^-9]};
schedule={
  {0*60,0,0},
  {intervalTime*60,nInput*10^-9,0},
  {60*60,0,nInput*10^-9}};
tmax=60*60;
sol=SimulateRxnsysWithSchedule[rsys1,schedule,{SA,SB}];
plotter1={OX[t*60]*10^9,OY[t*60]*10^9}/.sol;
timeRes1={OX[tmax]/OY[tmax]}/.sol;
cciSim=Plot[plotter1,{t,0,tmax/60},PlotRange->{0,All},
  PlotStyle->{{Thick,RGBColor["#29ABE2"]},{Thick,RGBColor["#FF00FF"]}},
  PlotLegends->Placed[{Text[Style["OX-sim",16]],Text[Style["OY-sim",16]]},{0.81,0.65}}];
ka=10^13;
rsys2={
  revrxn[SA+DA,W1+KA,k1,k2],
  revrxn[SB+DB,W2+KB,k1,k2],
  rxn[KA+KB+ANNI,W7+W8,ka],
  rxn[KA+DB,SX+W4,k3],
  rxn[KB+DA,SY+W3,k3],
  rxn[SX+RX,OX+W5,k4],
  rxn[SY+RY,OY+W6,k4],
  conc[DA,nSub*10^-9],
  conc[DB,nSub*10^-9],
  conc[RX,nSub*10^-9],
  conc[RY,nSub*10^-9],
  conc[ANNI,nAnni*10^-9]};
schedule={
  {0*60,0,0},
  {intervalTime*60,nInput*10^-9,0},

```

```
{60*60,0,nInput*10^-9}};  
tmax=60*60;  
sol=SimulateRxnsysWithSchedule[rsys2,schedule,{SA,SB}];  
plotter2={OX[t*60]*10^9,OY[t*60]*10^9}/.sol;  
timeRes2={OX[tmax]/OY[tmax]}/.sol;  
cciSimAnni=Plot[plotter2,{t,0,tmax/60},PlotRange->{0,All},  
PlotStyle->{{Thick,RGBColor["#29ABE2"]},{Thick,RGBColor["#FF00FF"]}},  
PlotLegends->Placed[{Text[Style["OX-sim",16]],Text[Style["OY-sim",16]]},{0.81,0.65}}];
```
